# Supplementary material
Source: ML conference proceedings conference paper supplement (https://openreview.net/forum?id=3zvB14IF6D)

Ground-truth novel views

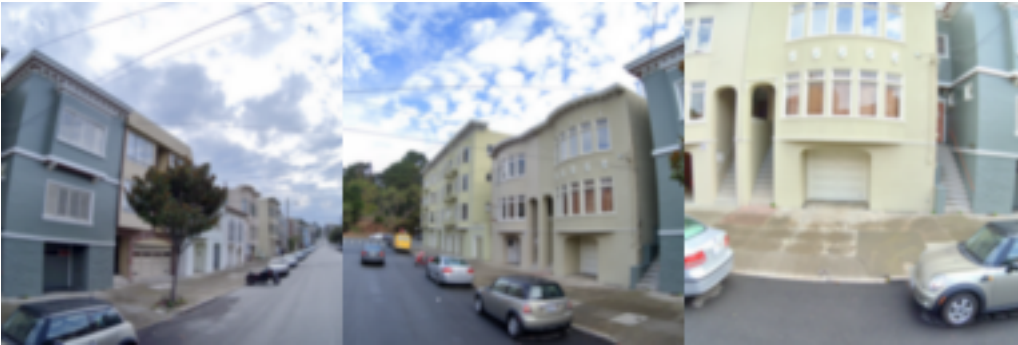

OSRT - Predicted novel views

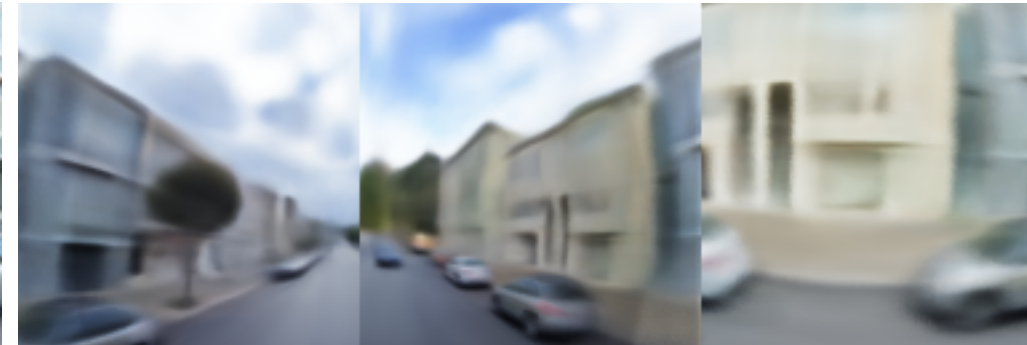

OSRT - Decomposition (Soft)

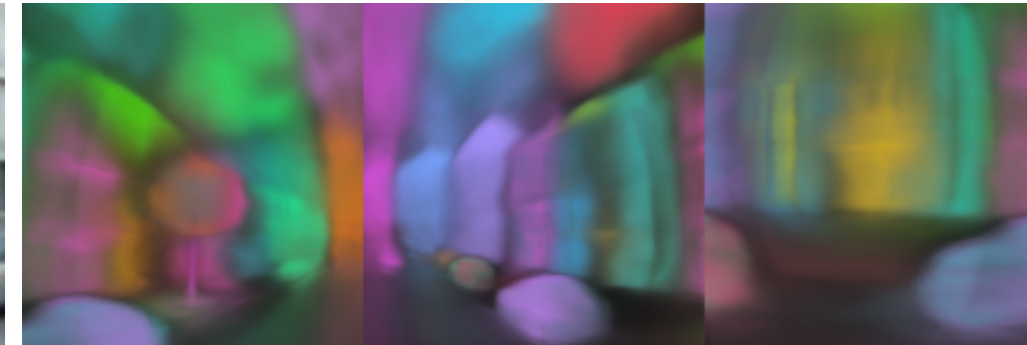

OSRT - Decomposition (Hard)

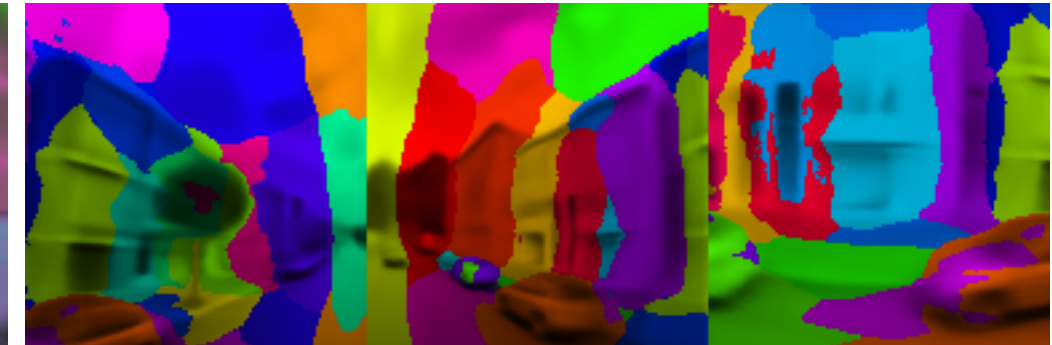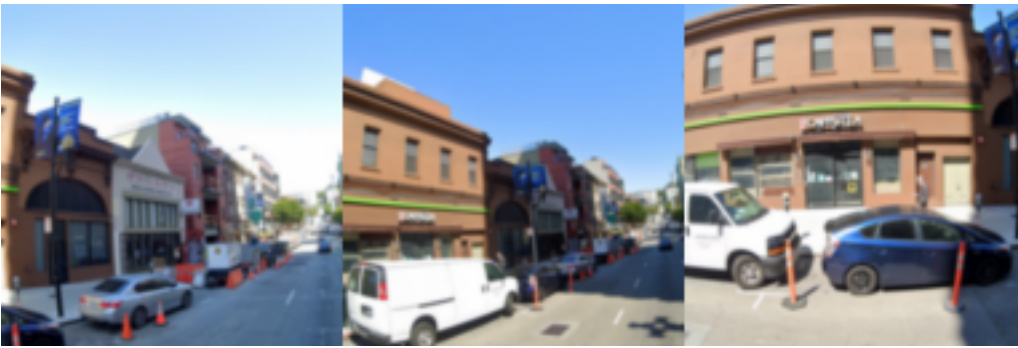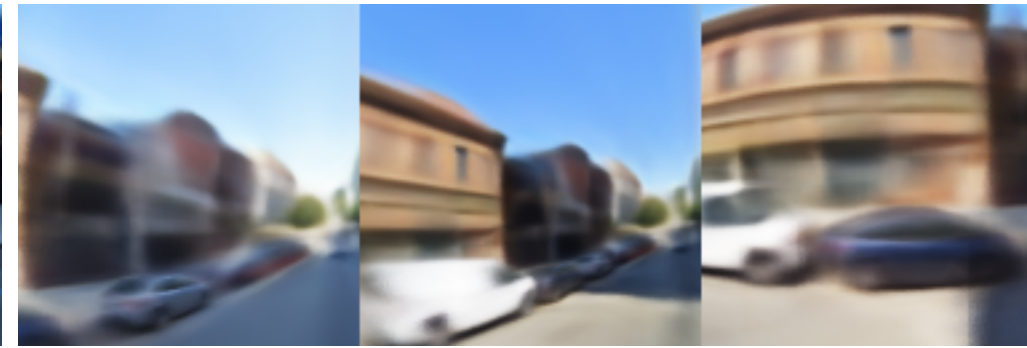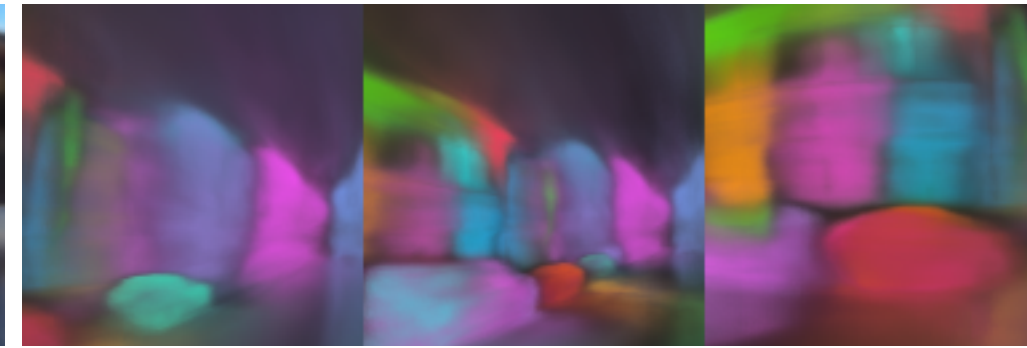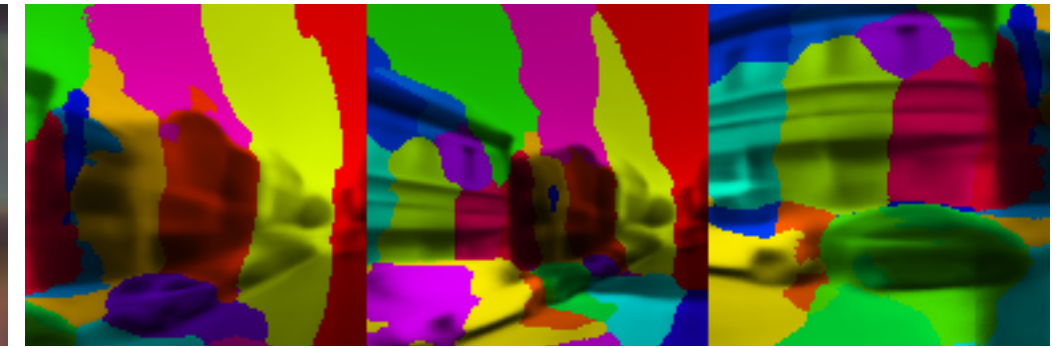

Supplement: supplementary_material [file attachment]
