# Supplementary material
Source: ML conference proceedings conference paper supplement (https://openreview.net/forum?id=3zvB14IF6D)

## Ground-truth input views

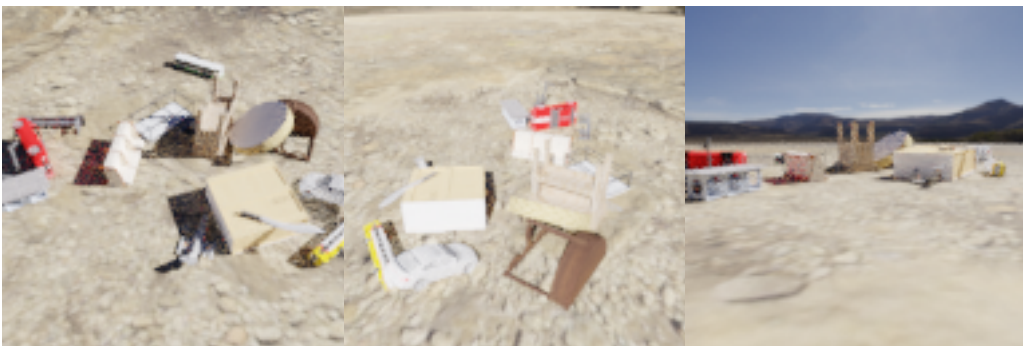

## OSRT - Predicted input views

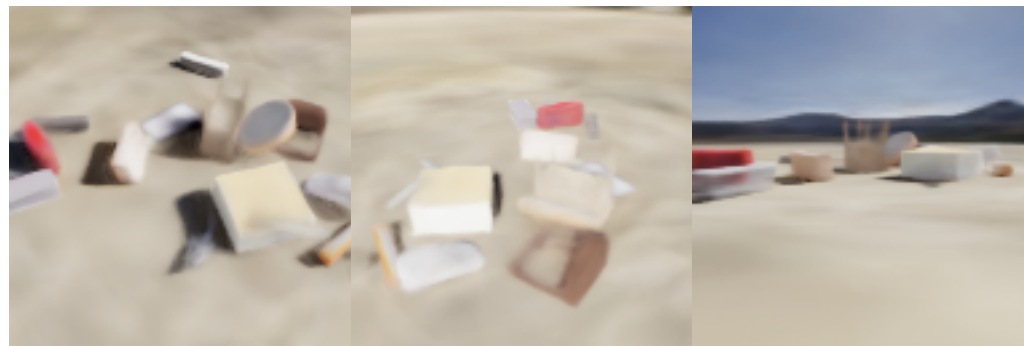

## DORSal - Predicted input views

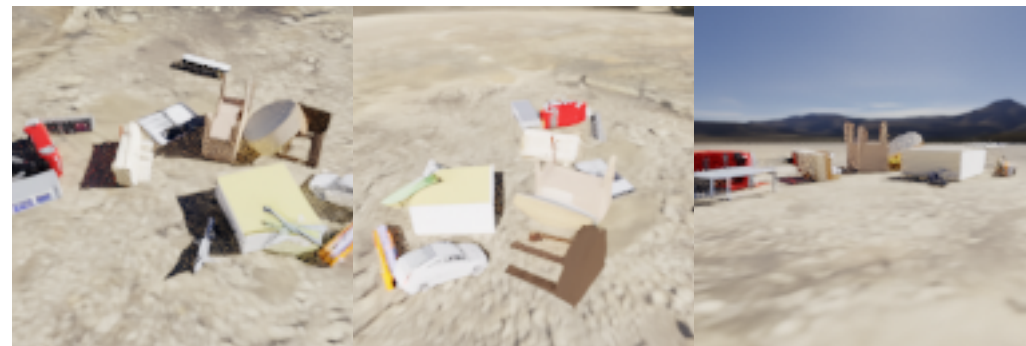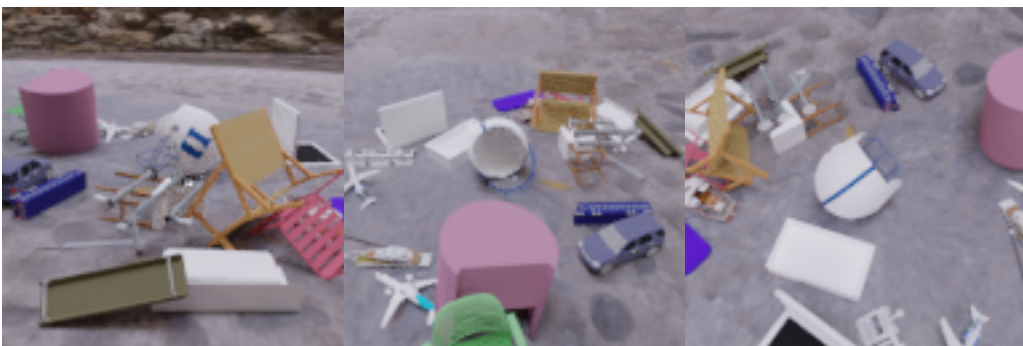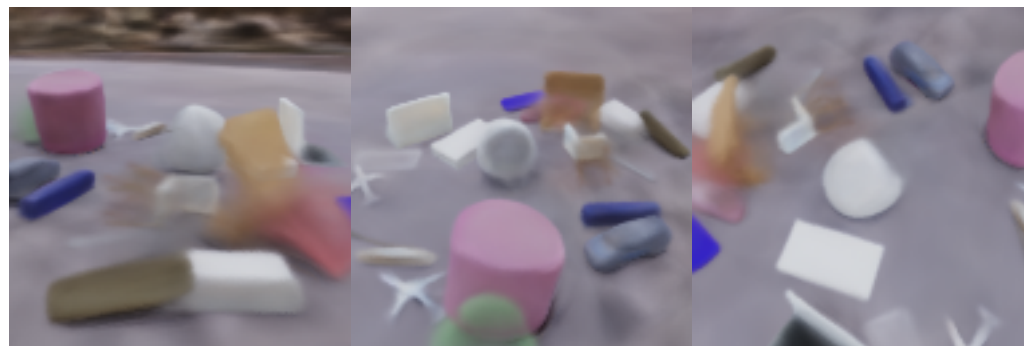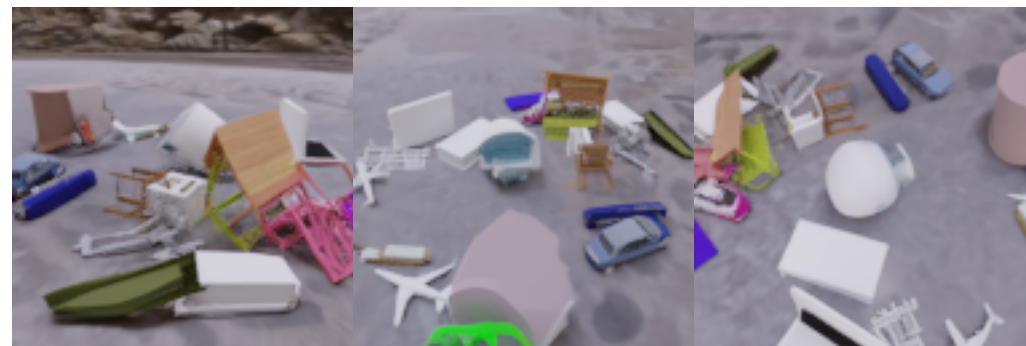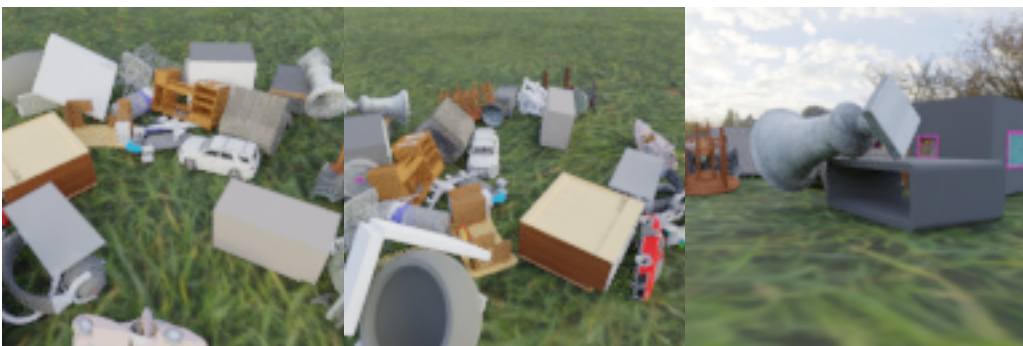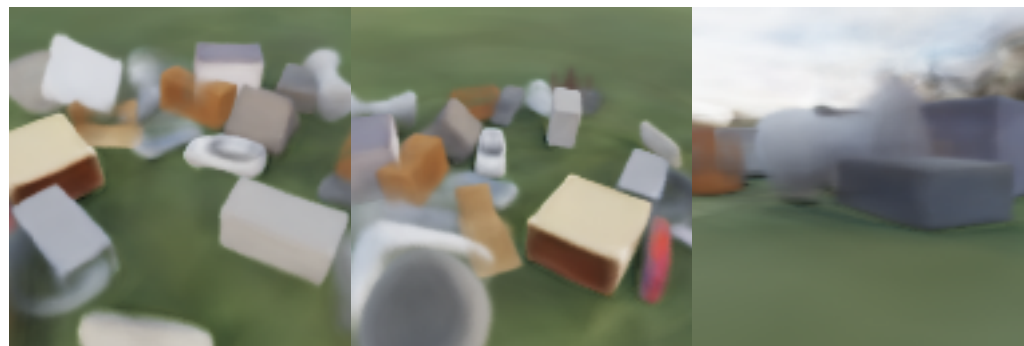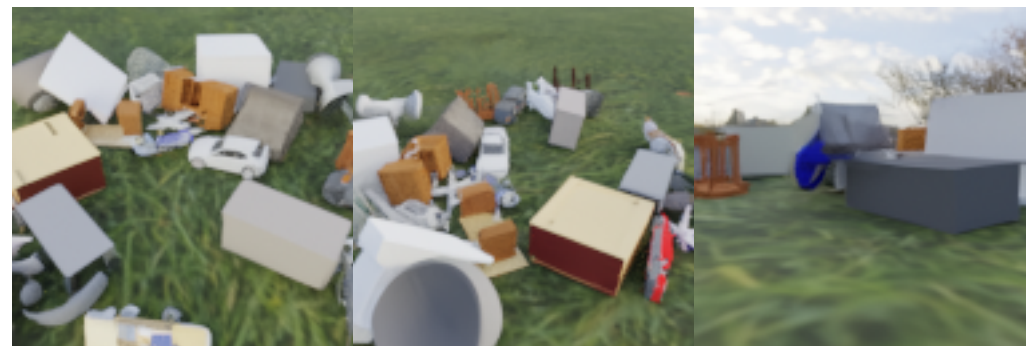

Supplement: supplementary_material [file attachment]
